# Supplementary material
Source: PubMed Central journal article supplement (PMC6395348)
Supplement: 2018_196196-Disclosures_and_Contributions.pdf [file 2018_196196-Disclosures_and_Contributions.pdf]

Haematologica  
HAEMATOL/2018/196196  
Version 3

DNA methylation profiling of hepatosplenic T-cell lymphoma

Anke K. Bergmann, Virginie Fataccioli, Giancarlo Castellano, Nadine Martin-Garcia, Laura Pelletier, Ole Ammerpohl, Juri Bergmann, Jaydeep Bhat, Enrique Carrillo-de Santa Pau, José I. Martín-Subero, Andrea B. Moffitt, Alfonso Valencia, Hans-Heinrich Oberg, Daniela Wesch, Sandrine Jayne, Martin J.S. Dyer, Dieter Kabelitz, Philippe Gaulard, and Reiner Siebert

Disclosures: none

Contributions: A.K.B. and R.S. initiated and designed the study, A.K.B. and R.S. wrote the manuscript, A.K.B, L.P. and A.M. performed sequencing analysis, A.K.B., G.C., E.CSP.,A.V. performed the bioinformatic analysis. N.MG. performed IHC experiments. O.A., J.Be. and J.I.M-S. supported data interpretation.D.W., H.H.O., J.Bh., S.J. and M.D. D.K. provided sample material and immunological data. P.G. and V.F. provided sample material, clinical data and IHC data.
